# Supplementary material
Source: Springer Nature journal article supplement (https://www.springermedizin.de/resource/supplementary/12906_2013_1617_MOESM7_ESM.pdf/9522632)

(A)

■ Temporal up-pattern  
■ Temporal down-pattern  
■ MicroRNA target

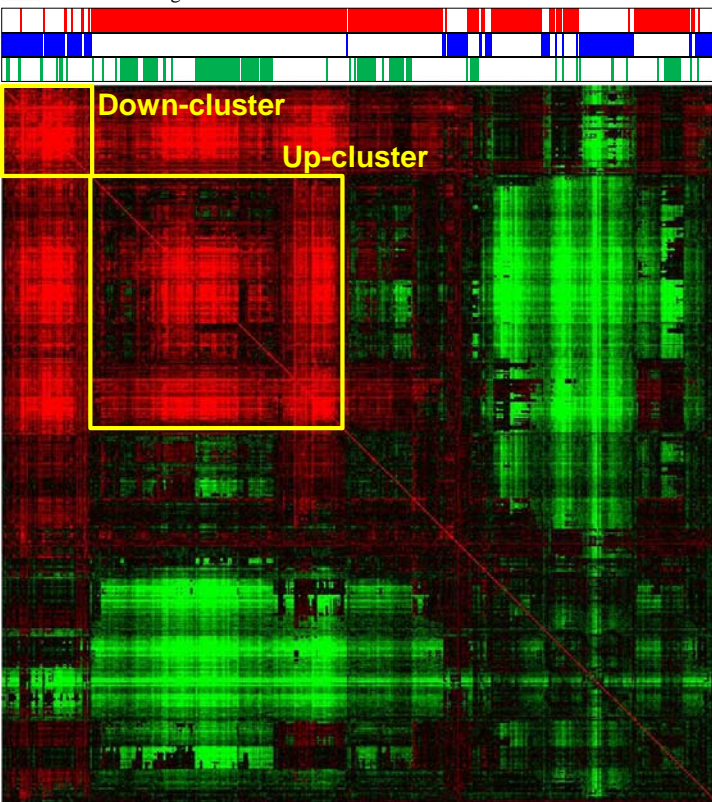

Similarity ■ -1 ■ 0 ■ 1

(B)

■ MicroRNA target

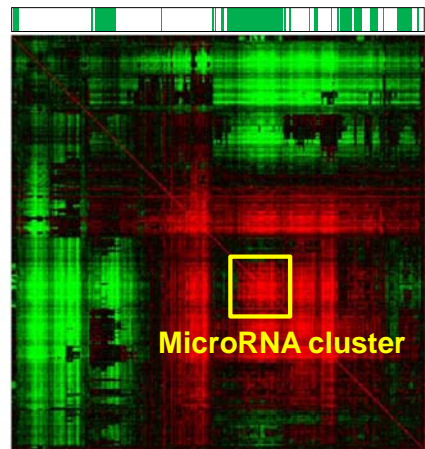

(C)

■ MicroRNA target

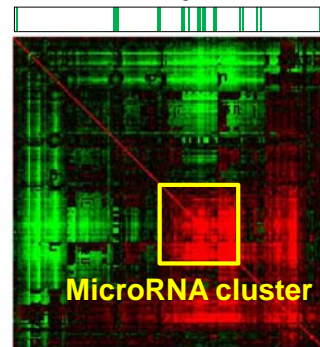

Supplement: MOESM7 [file 9522632]
